# Supplementary material
Source: Springer Nature journal article supplement (https://www.springermedizin.de/resource/supplementary/13023_2013_639_MOESM3_ESM.pdf/9642540)
Supplement: MOESM3 [file 9642540]

TBX6-001 transcript

NM\_004608.3

1803 bp

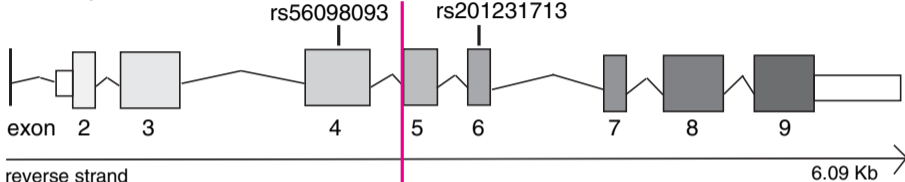

NP\_004599.2

436 aa

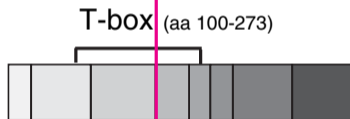

|                   |                     |
|-------------------|---------------------|
| Homo sapiens      | cct ccc a g CTG ATC |
| Mus musculus      | cct ccc a g CTG ATC |
| Rattus norvegicus | cct ccc a g CTG ATC |
| Pan troglodytes   | cct ccc a g CTG ATC |
| Pongo pygmaeus    | cct ccc a g CTG ATC |
| Gorilla gorilla   | cct ccc a g CTG ATC |
